# Supplementary material for: Development and application of an improved protocol to characterize biofilms in biologically active drinking water filters
Source: Royal Society of Chemistry journal article supplement (doi:10.1039/c6ew00279j), 2016-12-12
Supplement: c6ew00279j1.pdf [file c6ew00279j1.pdf]

## **Development and Application of an Improved Protocol to Characterize Biofilms in Biologically Active Drinking Water Filters**

**Ahmed M. Elhadidy\***, Michele I. Van Dyke, Fei Chen, Sigrid Peldszus, Peter M. Huck

NSERC Chair in Water Treatment, Department of Civil and Environmental Engineering,  
University of Waterloo, 200 University Avenue West, Waterloo, Ontario N2L 3G1, Canada

\* Corresponding author. Tel +1-226-978-4231; Email a2elhadi@uwaterloo.ca

### **Contents**

- Figure S1. Organic carbon peak retention time for polyethylene glycol (PEG) standard solutions as measured by LC-OCD.....Page 2
- Table S1. Biomass and EPS characterization data for 21 biofilter media samples including sand (S) and anthracite (A)..... Page 3
- Table S2. Enzymes commonly found in bacterial biofilms<sup>1</sup>. Protein information was obtained from the Universal Protein Resource Knowledge Base (UniProtKB) and molecular composition generated using the ProtParam tool from the SIB Bioinformatics Resource Portal<sup>2</sup>.....Page 4

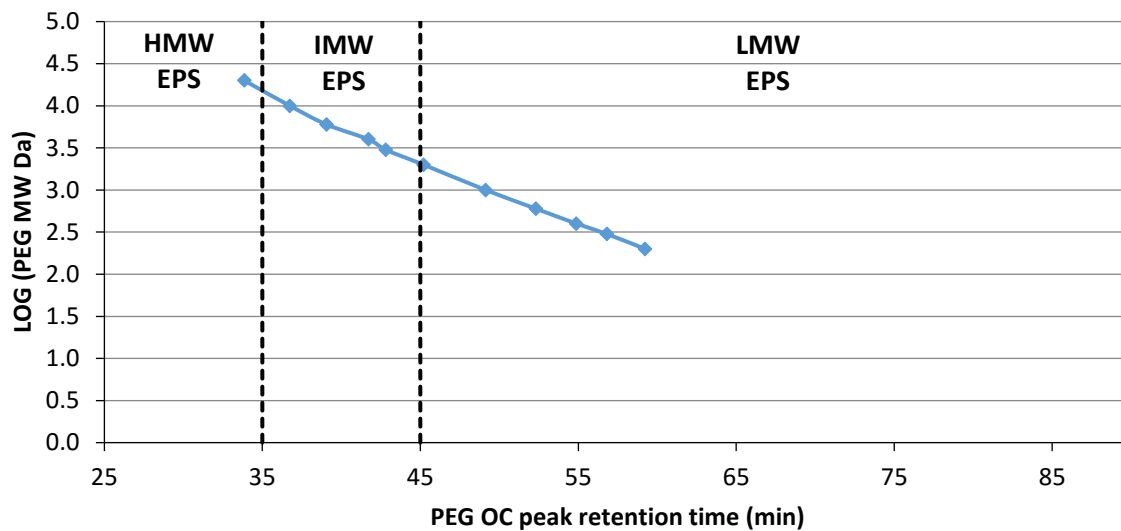

Figure S1. Organic carbon peak retention time for polyethylene glycol (PEG) standard solutions as measured by LC-OCD.

| Sampling Date | Biofilter   | Sampling depth (cm) | Media Type | Cell Count (cells / cm <sup>3</sup> ) | ATP (ng ATP / cm <sup>3</sup> ) | Proteins (µg BSA / cm <sup>3</sup> ) | Carbohydrates (µg D-Glucose/ cm <sup>3</sup> ) | Protein Like FEEM response (A.U. / cm <sup>3</sup> ) | Fulvic acid like FEEM response (A.U. / cm <sup>3</sup> ) | Humic acid like FEEM response (A.U. / cm <sup>3</sup> ) | HMW EPS Organic carbon (ng C/ cm <sup>3</sup> ) | HMW EPS Organic nitrogen (ng N/ cm <sup>3</sup> ) | HMW EPS UV Absorbance (10 <sup>-3</sup> x cm <sup>-1</sup> / cm <sup>3</sup> ) | IMW EPS Organic carbon (ng C/ cm <sup>3</sup> ) | IMW EPS Organic nitrogen (ng N/ cm <sup>3</sup> ) | IMW EPS UV Absorbance (10 <sup>-3</sup> x cm <sup>-1</sup> / cm <sup>3</sup> ) | LMW EPS Organic carbon (ng C/ cm <sup>3</sup> ) | LMW EPS Organic nitrogen (ng N/ cm <sup>3</sup> ) | LMW EPS UV Absorbance (10 <sup>-3</sup> x cm <sup>-1</sup> / cm <sup>3</sup> ) |
|---------------|-------------|---------------------|------------|---------------------------------------|---------------------------------|--------------------------------------|------------------------------------------------|------------------------------------------------------|----------------------------------------------------------|---------------------------------------------------------|-------------------------------------------------|---------------------------------------------------|--------------------------------------------------------------------------------|-------------------------------------------------|---------------------------------------------------|--------------------------------------------------------------------------------|-------------------------------------------------|---------------------------------------------------|--------------------------------------------------------------------------------|
| 2014-04-11    | Biofilter A | 10                  | A          | 1.1E+08                               | 322                             | 34                                   | 17                                             | 1912                                                 | 2432                                                     | 4010                                                    | 4194                                            | 1067                                              | 26                                                                             | 9204                                            | 1330                                              | 53                                                                             | 14658                                           | 4517                                              | 10                                                                             |
| 2014-04-11    | Biofilter A | 30                  | S          | 3.4E+08                               | 490                             | 62                                   | 28                                             | 4788                                                 | 1981                                                     | 3478                                                    | 10179                                           | 2445                                              | 57                                                                             | 12357                                           | 2563                                              | 62                                                                             | 21913                                           | 8437                                              | 17                                                                             |
| 2014-04-11    | Biofilter B | 10                  | A          | 1.4E+08                               | 325                             | 35                                   | 16                                             | 2014                                                 | 2682                                                     | 4355                                                    | 4509                                            | 1091                                              | 27                                                                             | 9693                                            | 1331                                              | 56                                                                             | 14783                                           | 4685                                              | 16                                                                             |
| 2014-04-11    | Biofilter B | 20                  | S          | 2.5E+08                               | 537                             | 67                                   | 40                                             | 5297                                                 | 2120                                                     | 3858                                                    | 11654                                           | 2642                                              | 66                                                                             | 14851                                           | 2804                                              | 71                                                                             | 26216                                           | 8125                                              | 33                                                                             |
| 2014-04-11    | Biofilter C | 85                  | S          | 2.1E+08                               | 378                             | 62                                   | 21                                             | 4859                                                 | 1748                                                     | 3048                                                    | 10075                                           | 2147                                              | 56                                                                             | 12167                                           | 2227                                              | 59                                                                             | 23000                                           | 7280                                              | 19                                                                             |
| 2014-05-08    | Biofilter A | 10                  | A          | 1.6E+08                               | 646                             | 62                                   | 25                                             | 4996                                                 | 2775                                                     | 5104                                                    | 8789                                            | 2176                                              | 44                                                                             | 15845                                           | 2500                                              | 85                                                                             | 28473                                           | 20229                                             | 41                                                                             |
| 2014-05-08    | Biofilter A | 30                  | S          | 1.6E+08                               | 514                             | 64                                   | 27                                             | 5999                                                 | 1905                                                     | 3573                                                    | 11137                                           | 2645                                              | 48                                                                             | 13000                                           | 2260                                              | 53                                                                             | 24003                                           | 17440                                             | 17                                                                             |
| 2014-05-08    | Biofilter B | 10                  | A          | 1.1E+08                               | 701                             | 60                                   | 26                                             | 5051                                                 | 3049                                                     | 5616                                                    | 8475                                            | 2283                                              | 45                                                                             | 15041                                           | 2448                                              | 82                                                                             | 27056                                           | 19501                                             | 25                                                                             |
| 2014-05-08    | Biofilter B | 20                  | S          | 2.7E+08                               | 661                             | 111                                  | 52                                             | 11833                                                | 4874                                                     | 7638                                                    | 20967                                           | 4746                                              | 86                                                                             | 27025                                           | 4895                                              | 129                                                                            | 56924                                           | 40910                                             | 64                                                                             |
| 2014-05-08    | Biofilter C | 85                  | S          | 1.2E+08                               | 256                             | 59                                   | 29                                             | 5654                                                 | 2553                                                     | 4280                                                    | 10025                                           | 2226                                              | 41                                                                             | 13458                                           | 2060                                              | 61                                                                             | 25154                                           | 21751                                             | 41                                                                             |
| 2014-05-29    | Biofilter A | 20                  | A          | 3.5E+08                               | 1088                            | 66                                   | 24                                             | 7664                                                 | 3262                                                     | 5992                                                    | 10093                                           | 2744                                              | 50                                                                             | 16487                                           | 2384                                              | 77                                                                             | 31705                                           | 15745                                             | 0                                                                              |
| 2014-05-29    | Biofilter A | 20                  | S          | 1.2E+09                               | 2158                            | 166                                  | 102                                            | 24289                                                | 5887                                                     | 12494                                                   | 33816                                           | 8518                                              | 139                                                                            | 37949                                           | 7105                                              | 166                                                                            | 79398                                           | 54100                                             | 47                                                                             |
| 2014-05-29    | Biofilter B | 20                  | A          | 3.6E+08                               | 782                             | 63                                   | 24                                             | 7116                                                 | 3361                                                     | 6168                                                    | 9535                                            | 2579                                              | 49                                                                             | 15950                                           | 2219                                              | 76                                                                             | 30318                                           | 12976                                             | 8                                                                              |
| 2014-05-29    | Biofilter B | 20                  | S          | 1.0E+09                               | 1954                            | 154                                  | 73                                             | 20632                                                | 5344                                                     | 11359                                                   | 31424                                           | 7515                                              | 125                                                                            | 35659                                           | 6246                                              | 156                                                                            | 71799                                           | 45826                                             | 18                                                                             |
| 2014-05-29    | Biofilter C | 85                  | S          | 1.4E+08                               | 531                             | 55                                   | 29                                             | 5351                                                 | 1726                                                     | 3432                                                    | 8042                                            | 1946                                              | 34                                                                             | 11521                                           | 1307                                              | 47                                                                             | 21864                                           | 1952                                              | 8                                                                              |
| 2014-06-19    | Biofilter A | 85                  | S          | 6.4E+08                               | 1332                            | 143                                  | 45                                             | 19610                                                | 3814                                                     | 9615                                                    | 29515                                           | 6791                                              | 102                                                                            | 25313                                           | 5616                                              | 105                                                                            | 59712                                           | 26973                                             | 64                                                                             |
| 2014-06-19    | Biofilter A | 20                  | A          | 2.6E+08                               | 539                             | 61                                   | 18                                             | 7037                                                 | 2537                                                     | 5138                                                    | 10510                                           | 2547                                              | 43                                                                             | 13198                                           | 2256                                              | 63                                                                             | 26719                                           | 10988                                             | 14                                                                             |
| 2014-06-19    | Biofilter B | 20                  | S          | 5.8E+08                               | 1048                            | 119                                  | 45                                             | 15412                                                | 3327                                                     | 8208                                                    | 24928                                           | 5550                                              | 83                                                                             | 21701                                           | 4481                                              | 90                                                                             | 49242                                           | 20854                                             | 63                                                                             |
| 2014-06-19    | Biofilter B | 20                  | A          | 1.9E+08                               | 317                             | 47                                   | 13                                             | 4332                                                 | 3466                                                     | 5944                                                    | 7222                                            | 1886                                              | 36                                                                             | 11072                                           | 1643                                              | 61                                                                             | 19081                                           | 6639                                              | 23                                                                             |
| 2014-06-19    | Biofilter B | 60                  | S          | 2.3E+08                               | 570                             | 67                                   | 24                                             | 7837                                                 | 1851                                                     | 4148                                                    | 12484                                           | 2903                                              | 45                                                                             | 12656                                           | 2162                                              | 46                                                                             | 26632                                           | 10529                                             | 33                                                                             |
| 2014-06-19    | Biofilter C | 85                  | S          | 1.4E+08                               | 376                             | 51                                   | 11                                             | 5044                                                 | 1495                                                     | 3117                                                    | 9777                                            | 2109                                              | 33                                                                             | 9759                                            | 1563                                              | 40                                                                             | 17843                                           | 7495                                              | 18                                                                             |

Table S1. Biomass and EPS characterization data for 21 biofilter media samples including sand (S) and anthracite (A).

| Enzyme Name             | UniProtKB ID number | C atoms | N atoms | C/N  | MW (KDa) | Aromatic Structure |
|-------------------------|---------------------|---------|---------|------|----------|--------------------|
| Protease                | L7VS79              | 2114    | 568     | 3.72 | 48       | yes                |
| Peptidase               | K2EKF2              | 1621    | 435     | 3.72 | 36.8     | yes                |
| $\alpha$ -Glucosidase   | S5ZCH6              | 2722    | 741     | 3.67 | 60       | yes                |
| $\beta$ -Glucosidase    | K4I2K9              | 3732    | 1008    | 3.70 | 84       | yes                |
| $\beta$ - Xylosidase    | C0INJ3              | 2687    | 755     | 3.56 | 60       | yes                |
| $\beta$ -Glucuronidase  | H8ZT98              | 1233    | 326     | 3.78 | 28       | yes                |
| Esterase/lipase protein | M1NXW5              | 1402    | 391     | 3.58 | 32       | yes                |
| Phosphatase             | W0FHD8              | 1323    | 312     | 4.24 | 28       | yes                |
| Endocellulase           | F8V2V6              | 1842    | 495     | 3.72 | 40       | yes                |
| Alginate lyase          | G3LI08              | 1566    | 433     | 3.62 | 35       | yes                |
| Chitinase               | Q5UM79              | 1286    | 328     | 3.92 | 28       | yes                |
| Esterase                | Q4TZQ3              | 1684    | 463     | 3.64 | 38       | yes                |
| Lipase                  | Q2KTB3              | 2865    | 772     | 3.71 | 65       | yes                |

Table S2. Enzymes commonly found in bacterial biofilms<sup>1</sup>. Protein information was obtained from the Universal Protein Resource Knowledge Base (UniProtKB) and molecular composition generated using the ProtParam tool from the SIB Bioinformatics Resource Portal<sup>2</sup>.

## References

1. W. Michalowski, Ph.D. Thesis, University of Duisburg-Essen, 2012, [https://duepublico.uni-duisburg-essen.de/servlets/DerivateServlet/Derivate-31823/diss\\_michalowski.pdf](https://duepublico.uni-duisburg-essen.de/servlets/DerivateServlet/Derivate-31823/diss_michalowski.pdf) (accessed Feb. 25, 2016).
2. E. Gasteiger, C. Hoogland, A. Gattiker, S. Duvaud, M. R. Wilkins, R. D. Appel and A. Bairoch, in *The Proteomics Protocols Handbook*, ed. J.M. Walker, Humana Press, 2005, pp. 571–607.
